# Supplementary material for: Ultrafast-Laser Micro-Structuring of LiNi0.8Mn0.1Co0.1O2 Cathode for High-Rate Capability of Three-Dimensional Li-ion Batteries
Source: MDPI journal article supplement (doi:10.3390/nano12213897), 2022-11-04
Supplement: s1 [file s1]

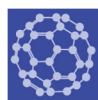

Supplementary Material

# Ultrafast-Laser Micro-Structuring of $\text{LiNi}_{0.8}\text{Mn}_{0.1}\text{Co}_{0.1}\text{O}_2$ Cathode for High-Rate Capability of Three-Dimensional Li-ion Batteries

Minh Xuan Tran <sup>1,2</sup>, Peter Smyrek <sup>3,4</sup>, Jihun Park <sup>5</sup>, Wilhelm Pfleging <sup>3,4,\*</sup> and Joong Kee Lee <sup>1,2,\*</sup>

<sup>1</sup> Division of Energy and Environmental Technology, KIST School, Korea University of Science and Technology (UST), Deajeon 34113, Korea

<sup>2</sup> Center for Energy Storage Research, Green City Research Institute, Korea Institute of Science and Technology (KIST), Seoul 02792, Korea

<sup>3</sup> Karlsruhe Institute of Technology, Institute for Applied Materials, P.O. Box 3640, 76021 Karlsruhe, Germany

<sup>4</sup> Karlsruhe Nano Micro Facility, Hermann-von-Helmholtz-Platz 1, 76344 Eggenstein-Leopoldshafen, Germany

<sup>5</sup> APC Technology, 108 68 Gangbyeonyeok-ro-4-gil, Gwangjin-gu, Seoul 05116, Korea

\* Correspondence: wilhelm.pfleging@kit.edu (W.P.); leejk@kist.re.kr (J.K.L.)

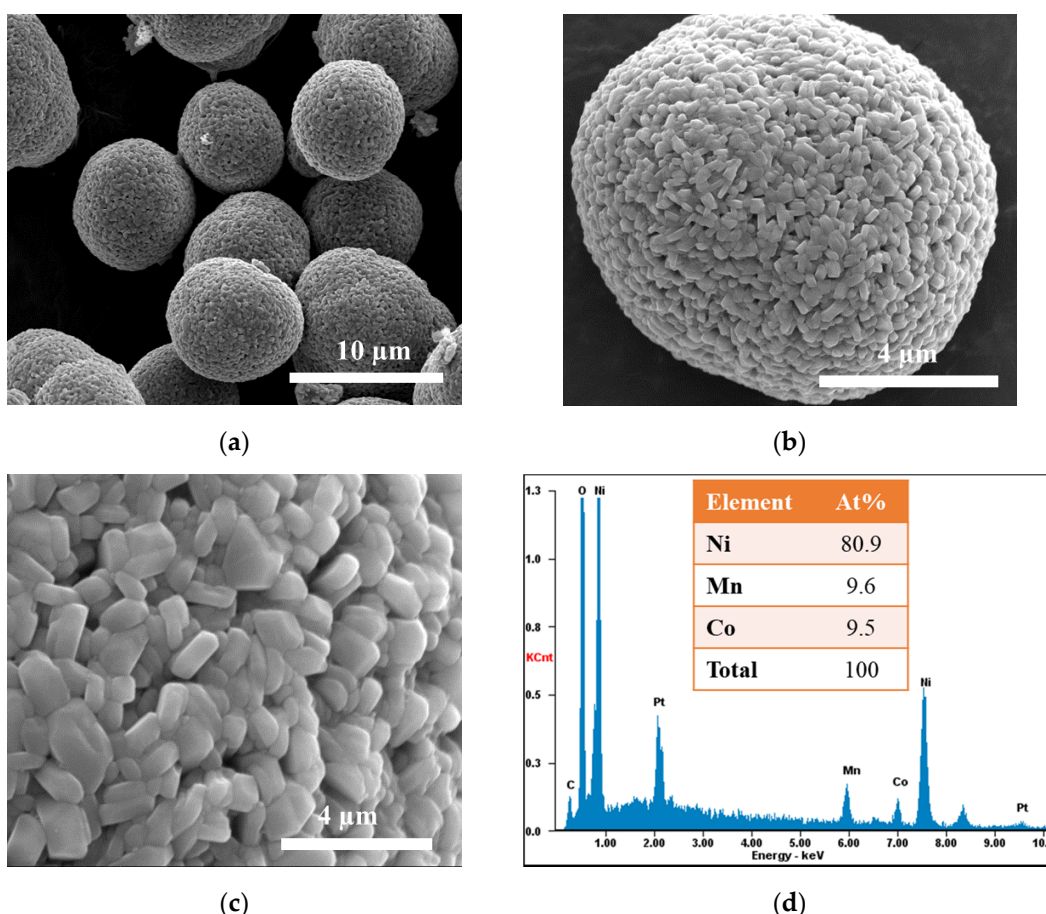

**Figure S1.** Morphology of NMC811 particles. ((a, b, c) SEM images of NMC811 particles and (d) EDX spectrum and element composition of selected area from SEM image (Figure c).

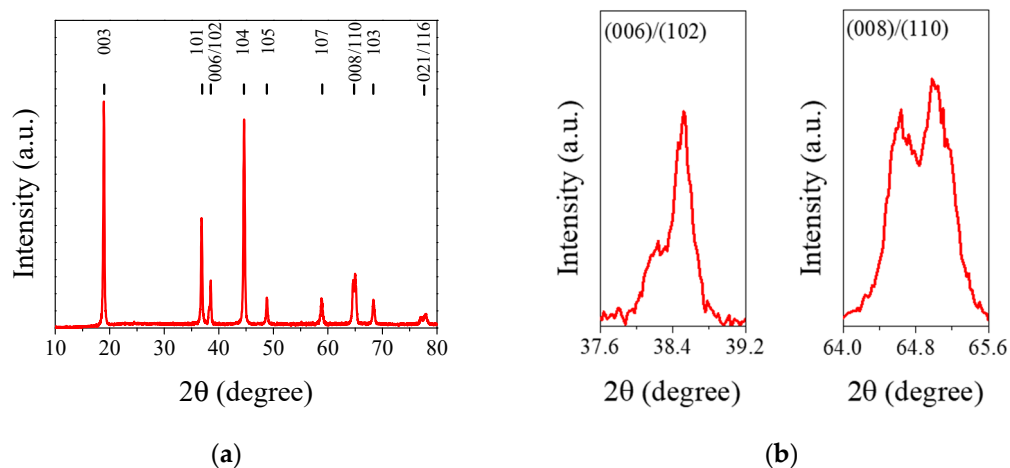

**Figure S2.** (a) XRD patterns of NMC811 and (b) the enlarged diffraction of (006)/(102) and (008)/(110) XRD peaks.

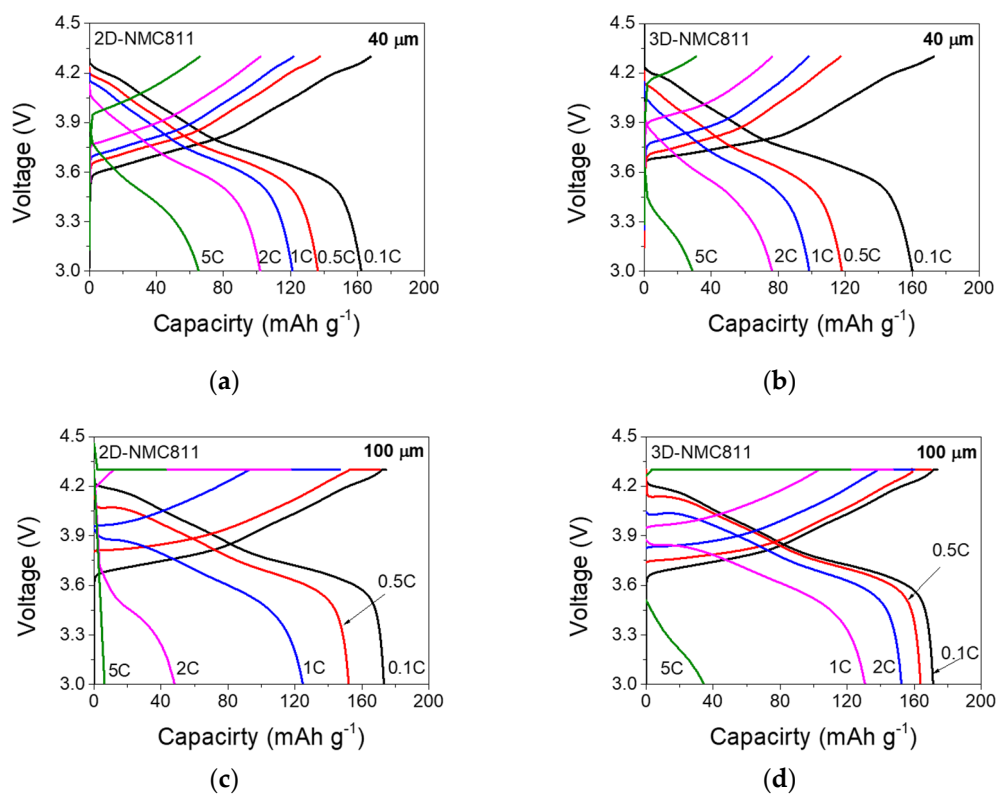

**Figure S3.** Galvanostatic charge/ discharge profiles of (a) 40-μm-2D-NMC811, (b) 40-μm-3D-NMC811, (c) 100-μm-2D-NMC811, and (d) 100-μm-3D-NMC811.

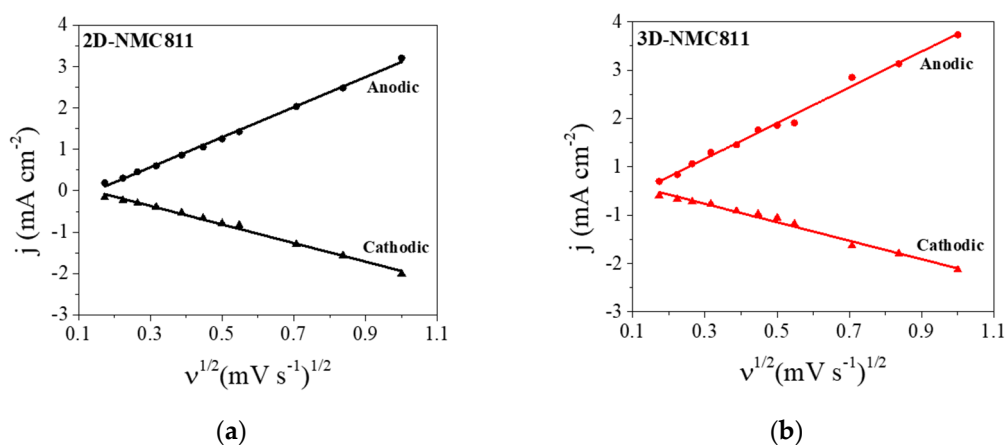

**Figure S4.** Diffusivity coefficient calculation. Normalized peak current obtained from CV scans plotted as a function of the square root of the scan rate for (a) 2D-NMC811 and (b) 3D-NMC811.

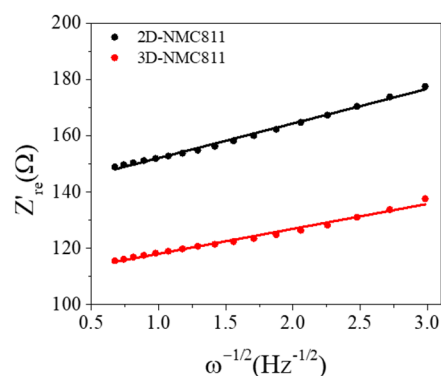

**Figure S5.** Linear fit lines demonstrating correlation between  $Z_{re}$  and  $\omega^{-1/2}$  extracted from EIS data.

**Table S1.** Summary of effect of laser structuring on electrodes at various thickness. .

| Characteristics                  | Electrode thickness ( $\mu\text{m}$ ) |      |
|----------------------------------|---------------------------------------|------|
|                                  | 40                                    | 100  |
| Increase of interfacial area (%) | 20                                    | 78   |
| Aspect ratio (AR)                | 0.96                                  | 3.72 |
| Loss of material (%)             | 10                                    | 6.4  |
| Effective area ( $\text{cm}^2$ ) | 1.13                                  | 2.01 |

**Table S2.** Fitting results for impedance spectra and calculated  $D_{\text{Li}^+}$  from CVs and electrochemical impedance spectroscopy.

| Electrodes | $D_{\text{Li}^+}$ ( $\text{cm s}^{-2}$ ) by CVs |                       | EIS                |                       |                                          |
|------------|-------------------------------------------------|-----------------------|--------------------|-----------------------|------------------------------------------|
|            | Anodic                                          | Cathodic              | $R_s$ ( $\Omega$ ) | $R_{CT}$ ( $\Omega$ ) | $D_{\text{Li}^+}$ ( $\text{cm s}^{-2}$ ) |
| 2D-NMC811  | $16.6 \times 10^{-11}$                          | $2.0 \times 10^{-11}$ | 3.2                | 136.6                 | $1.6 \times 10^{-11}$                    |
| 3D-NMC811  | $18.9 \times 10^{-11}$                          | $1.9 \times 10^{-11}$ | 1.4                | 107.7                 | $3.5 \times 10^{-11}$                    |
